# Supplementary material for: Determination of natural populations to be included in breeding program in St. John’s wort species (Hypericum perforatum L.)
Source: PeerJ. 2024 Oct 16;12:e18336. doi: 10.7717/peerj.18336 (PMC11490227; doi:10.7717/peerj.18336)
Supplement: Supplemental Information 1 [file peerj-12-18336-s001.xls]

## Sheet: 1 year
year	replicate	Population Code	Flower diameter (mm)	Petal length (mm)	Petal width (mm)	leaf length	leaf width	stem diameter	stem number	Plant height	Distance between the highest and lowest flowers	Number of flowering	Fresh flower weight (g plant-1)	Dry flower weight (g plant-1)	Pseudohypericin (mg/100g-1)	Hypericin	Hyperforin (%)
1	1	1-AL	23.53	12.96	6.08333	15.155	4.025	4.91	19.5	100.5	23	shoots	70.7143	29.0532	75.26	(mg/100g-1)	3.95	23.4
1	1	4-KC	23.8433	13.6767	5.81	12.08	3.8	3.235	9.5	60.5	7	7	40	15.5102	79.25	58.26	3.08	22.3233
1	1	5-KGU	21	12	5	14	4	4.5	9	50	19	11	10	3.7	83.47	53.58	3.72	21.89
1	1	6-EA	21.0733	11.9367	5	11.53	3.535	3.32	23.5	64.5	8	9	34.1176	12.4661	87.07	56.27	3.21	23.0033
1	1	7-EC	24.6167	11.2767	6.83667	11.76	3.015	2.905	14.5	65.5	13	8	24.4444	9.92481	104.25	66.9	4.2	23.4833
1	1	8-KK	23.2467	12.9533	4.96667	13.765	4.715	3.34	19.5	69.5	7.5	8	30	13.1068	60.455	55.9267	3.78	22.1467
1	1	9-AY	24	13	5.5	11	4.2	3.9	19.7	50	10	8	11.5625	4.50938	61.63	33.85	0.96	26.3867
1	1	10-MB	27.1233	13.5567	5.98667	19.49	4.425	3.15	17.5	65.5	16.5	11.5	47.4074	19.0822	58.695	70.33	3.18	28.2233
1	1	11-MC	23.44	12.03	4.89	15.25	3.905	3.445	20	65.5	15	11.5	62.963	25.7173	67.29	59.145	2.415	27.34
1	1	12-SH	24.08	11.0567	7.17667	14.505	4.765	3.6	21	98	24	18.5	62.9032	26.0599	71.31	71.705	3.43	24.0367
1	1	13-AMI	22.57	12.3533	5.63667	13.805	3.415	3.31	8.5	79	21.5	16	48	20.2286	44.395	59.2433	3.23667	26.1567
1	1	14-GC	24.99	13.9633	6.11333	14.555	3.105	3.63	15.5	67.5	18	13.5	89.0909	35.3002	72.935	95.5067	2.89667	25.03
1	1	15-GU	23.9933	12.36	6.02667	14.695	2.905	2.36	10	57.5	25.5	17	40	16.0714	57.445	65.3833	2.52	24.79
1	1	16-GPD	21.9	13.0467	5.97	16.64	4.565	5.84	14.5	94.5	25	14	85.9375	33.9753	44.985	73.425	4.47	21.98
1	1	17-MU	25.85	12.18	6.77	15.44	4.66	5.11	11	100	20	13	85	34	54.2	90.25	3.42	19.91
1	1	18-BAL	25.39	12.05	6.14	3.72	17	3.2	20	101	23	13	106.667	40.5333	52.2	86.06	3.36	21.87
1	1	19-BIL	28.55	15.31	6.68	12.85	2.56	1.94	23	44	8	17	41.7949	13.3744	35.1	52.08	1.92	24.99
1	1	20-KUT	24.18	12.55	5.52	15.6	2.36	3.14	5	95	29	6	130	48.1	23.5	74.36	3.36	22.47
1	1	21-TOPAZ	25.08	13.37	5.08	9.83	2.02	1.73	5	32	7	11	49.3333	21.7067	45.6	51.3	2.9	23.8572
1	2	1-AL	23.4	12.9667	7.19	17.185	4.71	4.93	9.5	105	20.5	12.5	88.3333	34.2941	45.23	61.98	3.94
1	2	4-KC	22.3233	13.69	7.01333	13.55	3.975	3.7	13	54.5	11.5	6	37.2	13.206	67.26	60.26	3.45
1	2	5-KGU	21.89	12.7667	5.39333	15.375	4.375	4.95	9.5	56	20	12	11.875	4.47596	61.36	45.14	3.17
1	2	6-EA	23.0033	13.3867	5.52	13.88	4.68	4.05	15.5	59.5	15.5	12	71.8182	27.9006	83.73	55.74	4.03
1	2	7-EC	23.4833	13.4433	6.92	13.535	3.73	4.07	25.5	73	13	9.5	56.2581	19.9824	103.17	71.49	3.58
1	2	8-KK	22.1467	12.4333	6.45	14.06	4.98	5.425	11.5	71	12	13	62.6923	24.949	58.08	43.47	3.31
1	2	9-AY	26.3867	14.4	5.25333	13.805	4.89	5.26	20.5	49.5	9	10	11.1333	4.05794	55.16	58.55	3.18
1	2	10-MB	28.2233	14.3633	6.46	18.54	4.71	4.71	15	81.5	6.5	12.5	69.375	26.9382	56.32	58.7	2.21
1	2	11-MC	27.34	14.8533	7.31	13.905	3.78	3.095	17	57	9	10.5	46.8438	17.9478	74.98	50.48	2.24
1	2	12-SH	24.0367	11.6967	6.65	15.075	4.52	4.125	18	97.5	23	14	75.3125	28.7319	61.9	35.98	3.21
1	2	13-AMI	26.1567	13.8067	6.13	18.415	3.74	4.375	22.5	89.5	12.5	7	95.1613	37.3099	35.3	35.7	2.96
1	2	14-GC	25.03	14.0267	5.86667	14.455	4.32	4.45	21.5	74	16.5	8	88.625	34.9709	57.41	56.72	2.55
1	2	15-GU	24.79	12.79	6.65	17.255	3.535	3.925	20	76	12.5	9	40.9375	15.5723	48.22	58.06	1.82
1	2	16-GPD	21.98	12.9767	6.39	13.925	4.15	4.585	28.5	98.5	15	11	80	29.9029	36	39.65	3.51
1	2	17-MU	19.91	11.7	4.63	14.47	4.11	3.76	13	110	21	16	90	35.1	54.74	65.2	3.77
1	2	18-BAL	21.87	10.55	4.69	16.9	3.25	3.2	7	102	23	16	150	55.5	52.43	48.24	3.39
1	2	19-BIL	24.99	14.02	6.12	12.56	3.87	4.6	20	56	9	10	41.7949	12.9564	35.42	58.88	2.7
1	2	20-KUT	22.47	11.31	6.35	12.41	2.3	4.66	6	98	24	8	130	46.8	24.14	39.46	3.26
1	2	21-TOPAZ	18.98	11.29	4.54	9.02	1.92	2.19	6	54	13	13	49.3333	21.2133	46.08	52.32	3.3
1	3	1-AL	24.3767	13.4867	5.48333	15.775	4.495	4.99	17	104.5	20.5	9.5	81.2069	32.3507	56.1	58.83	4.09
1	3	4-KC	25.1667	13.9133	6.33	12.305	2.865	3.84	9	58	15	8	48.3333	16.8272	75.18	40.53	2.92
1	3	5-KGU	22	13	6	15	4.8	4	10	60	22	13	12.0312	4.45156	72.415	48.38	3.36
1	3	6-EA	25.7833	14.3667	6.09333	12.075	4.04	4.31	13.5	55.5	15	9	50.3571	19.0541	75.78	55.65	3.98
1	3	7-EC	26.07	13.67	6.79667	12.285	3.69	3.095	18.5	61.5	13	10	47.069	15.9348	105.33	65.68	3.27
1	3	8-KK	23.5	11.9967	5.22667	15.77	5.39	3.47	17.5	72.5	6.5	11	57.619	24.7491	62.83	40.77	3.35
1	3	9-AY	23.0333	12.4633	5.75667	10.685	3.42	3.11	19.5	52	11.5	5.5	22.3333	8.39042	68.1	76.66	3.58
1	3	10-MB	24.67	13.2333	5.69333	18.38	4.41	3.55	20	80	11	9.5	65.5172	24.0506	61.07	69.33	2.12
1	3	11-MC	24.6667	14.66	6.30667	13.995	3.8	3.385	12	63	10	11.5	57.7586	19.5921	59.6	43.12	2.41
1	3	12-SH	23.6133	11.9433	6.82667	16.68	5.095	4.45	17	102	22.5	14	69.3548	25.6176	80.72	50.06	2.92
1	3	13-AMI	27.4467	15.6333	5.31	12.5	2.85	3.325	12.5	86	10.5	13	74.8214	26.3575	53.49	46	2.9
1	3	14-GC	24.9367	13.2367	5.77	16.845	3.695	3.815	17.5	84	11	9.5	86.4444	33.017	88.46	60	2.34
1	3	15-GU	24.5667	14.36	5.95	18.31	3.025	4.32	24.5	71.5	14	16	45.625	18.0495	66.67	59.98	2.02
1	3	16-GPD	26.0233	12.4767	5.2	18.325	4.19	5.59	11	95	14	8	79.8438	30.2514	53.97	47.18	3.68
1	3	17-MU	22.72	11.67	4.4	18.3	6.32	6.47	12	107	26	10	98	38.3289	55.3	90.25	3.42
1	3	18-BAL	22.37	11.58	4.46	18	3.2	4	35	104	17	10	130	48.75	52.7	86.06	3.36
1	3	19-BIL	26.76	15.28	6.19	12.14	3.72	3.5	22	84	16	19	41.7949	13.3069	35.75	52.08	1.92
1	3	20-KUT	24.76	12.66	5.76	12.6	3.19	3.9	8	94	28	9	130	47.6884	24.9	74.36	3.36
1	3	21-TOPAZ	20.64	10.28	5	9.52	1.91	2.58	13	72	19	10	49.3333	21.5273	46.6	52.5	3.3

## Sheet: 2 year
replicate	Population Code	Plant height	stem number	stem diameter	Distance between the highest and lowest flowers	Number of flowering shoots	Flower diameter (mm)	Petal length (mm)	Petal width (mm)	leaf length	leaf width	Fresh flower weight (g plant-1)	Dry flower weight (g plant-1)	Pseudohypericin (mg/100g-1)	Hypericin	Hyperforin (%)
1	1-AL	107.5	20	5.61	14	shoots	23.25	13.85	5.93	22	5.15	210	90.7773	58.8633	(mg/100g-1)	3.99333
1	4-KC	58.5	15	4.055	8	7	24.575	13.415	5.635	20.98	5.36	128.5	49.8973	73.8967	59.6	3.15
1	5-KGU	30	35	3.31	6	13	19.4	12.17	2.78	13.76	4.41	48	20.66	72.415	63.6	3.41667
1	6-EA	59.3333	22.6667	3.38833	6	10.3333	21.6867	12.4	5.88667	12.6033	3.87667	97.4545	38.9818	100.24	88.39	3.5
1	7-EC	58.6667	22.6667	3.54333	7.33333	9.66667	21.4233	11.3933	5.66333	13.4467	5.00333	94	37	118.52	78.01	4.82
1	8-KK	83	13.5	3.68	11	10.5	16.6767	12.11	4.89	16.6667	5.10667	251	126.768	73.68	54.06	3.83
1	9-AY	37	20	2.23	5	5	20	11.93	2.74	11.14	3.5	39.93	17	61.63	85.6	2.57333
1	10-MB	68	25.5	4.345	12	12.5	23.34	13.11	5.79	18.1	3.42	210.56	86.6059	58.7	68.225	2.50333
1	11-MC	63	24.6667	4.215	7.33333	9.66667	17.1133	11.5733	4.77333	13.5	4.40667	169.111	78.7904	48.47	51.83	2.43
1	12-SH	109.5	33	4.5525	18	14	22.54	11.805	4.855	20.81	5.87	252.7	110.937	71.4	76.4	3.18667
1	13-AMI	72.3333	14.3333	3.975	11	8.33333	18.4967	11.59	3.96	17.5	4.43333	194.286	92.4042	86.05	64.32	3.91
1	14-GC	78	20.6667	4.085	7	9.66667	17.79	9.56333	3.59667	14.7333	3.49333	149.5	70.4786	96.12	90.28	2.41
1	15-GU	71	21	3.03833	12.3333	10.3333	14.4633	11.65	3.40667	15.8333	4.63333	102	49.1111	108.34	72.34	2.25
1	16-GPD	87	14.3333	4.78333	8.33333	9.33333	19.2267	10.87	4.12333	17.2133	5.1	99.2727	45.8182	85.35	66.16	4.72
1	17-MU	97	29	5.615	16	11	21.54	12.95	6.17	13.74	3.85	180.6	74.6712	84	99.2	3.53667
1	18-BAL	116	18	4.94	14	10	26.71	13.69	6.57	17.67	4.8	314	157.359	87.2	97.6	3.37
1	19-BIL	53	22	2.265	5	13	22.35	13.17	3.54	10	3	32.5	10.9593	57.6	63.6	2.18
1	20-KUT	111	26	4.59	17	13	26.4	11.45	4.49	23	7.36	175.5	76.4554	76.8	83.2	3.32667
	21-TOPAZ	47.57	7	2.2	8	10.6852	20.94	10.2	2.9	16.2609	4.59852	137.839	68.593	73.8	69.5	3.1
2	1-AL	110.333	18.3333	5.365	13	12.6667	25.1633	13.4533	6.20667	22.1667	5.53333	207.333	94.2424	90.28	160.08	3.45
2	4-KC	63.3333	71.5	3.91167	7.66667	10	24.07	12.43	4.99333	23.6	5.46667	167.143	70.2484	128.32	71.06	2.29
2	5-KGU	49	26	2.09	9	6	20.17	11.19	2.71	12.75	3.48	50	25	82.3275	55.9
2	6-EA	69.3333	29.3333	3.62833	12.6667	8	21.7567	12.7567	5.00333	17.4333	5.16667	107.2	45.5233	78.22	61.66	4.04
2	7-EC	72.6667	37.3333	4.125	7	10	19.6233	13.4733	5.84333	12.0233	4.19667	71.0769	29.6154	144.69	60.35	3.68
2	8-KK	50	11	2.6075	9.33333	11	17.1433	11.3433	3.60667	13.3	3.74667	218.667	96	82.34	47.3	3.66
2	9-AY	33	20	3.24	6	6	16.65	11.2	3.71	15.58	3.02	42	20	60.1	76.66
2	10-MB	64.3333	32	4.20167	10	11.3333	22.3933	12.7433	5.24667	20.5	3.46333	200.86	75.6179	69.7	66.12	2.85
2	11-MC	54	56	3.525	15	11	21.7233	12.2833	5.18667	11.8967	3.98	232	100.533	59.6	51.6	2.34
2	12-SH	108	41	4.645	18	11.5	22.2	12.3733	5.31	17.4067	5.11667	294	133.326	95.07	58.08	3.36
2	13-AMI	85.3333	49.3333	4.25167	10	9.33333	23.4867	13.7267	6.23333	11.2767	3.83667	272.333	114.807	66.88	49.11	2.26
2	14-GC	72.5	21.5	4.4425	10.5	9.5	20.3	10.15	5.275	19.6	4.465	235.5	108.631	107.47	92.17	3.7
2	15-GU	60.5	19.5	2.9775	13.5	11.5	16.47	10.58	3.33	13	4.2	80.2	34.4968	74.64	77.73	3.68
2	16-GPD	96.5	10	3.355	8.5	11	20.83	12.02	6.045	16.935	4.945	152.3	69.3709	70.2	73.45	4.12
2	17-MU	92	23	4.495	15	10	22.99	12.9	4.55	14.24	2.69	140.5	58.0913	83.99	81.9	3.83
2	18-BAL	115	37	5.485	18	14	26.4	13.66	4.14	12.24	3.71	349	153.214	82.41	73.4533	3.77
2	19-BIL	47	15	2.145	4	11	22.93	14.1	5.33	13.61	4.12	30.3	10.2174	48.975	54.3467	2.82
2	20-KUT	111	15	5.775	11	11	20.45	15.75	5.24	17.5	5.24	146.2	63.6911	69.43	62.7267	3.08
	21-TOPAZ	72.32	8	2.1	11.0093	10.2685	17.21	10.4	3.2	15.8366	4.24315	133.385	55	78.5	65.2	2.98
3	1-AL	114.667	30	5.77167	16	14	23.8633	12.82	5.36333	22.7333	4.93333	216	88.56	92.65	141.02	3.28
3	4-KC	67.6667	12	3.51167	8.66667	7.33333	25.71	14.4233	6.91	16.36	4.8	98.7368	35.1821	90.05	70.6	2.25
3	5-KGU	39.5	30.5	2.7	7.5	9.5	22.82	14.05	2.98	12.31	2.45	49	22.83	92.24	48.38	3.36
3	6-EA	64	25.6667	2.535	10.6667	12	22.9733	12.3867	7.07	15.2933	4.67667	99.4	35.9277	112.69	64	4.12
3	7-EC	61.6667	25.6667	3.56	10.6667	9.66667	26.39	13.32	6.13667	13.16	4.78	101.8	33.9333	109.1	62.34	4.1
3	8-KK	42	5	2.4	9	5	20.88	11.65	3.53333	12.7967	4.22	82.6667	42.6667	74.46	66.42	3.85
3	9-AY	44	20	2.43	8	7	18.65	10.02	2.45	12.26	3.32	40.965	18.5	40.32	33.85	0.96
3	10-MB	68.3333	26	4.705	14.3333	13	24.1867	13.8133	4.34333	15.1133	3.97667	214.667	95.7744	80.81	70.33	3.18
3	11-MC	72.6667	44.3333	3.20333	10	10	21.2	12.3133	4.70333	17.7	4.2	205.583	85.783	84.08	66.46	2.4
3	12-SH	112.667	19.3333	4.71833	19.3333	13	21.8633	11.2967	5.74333	22.5	5.64333	210.8	89.4906	115.45	85.33	3.5
3	13-AMI	82.3333	19.6667	3.92333	10	8.33333	21.5467	12.42	4.15333	11.2333	3.06667	131	60.4615	74.23	64.3	3.54
3	14-GC	78.6667	33.3333	5.18667	12.6667	11	20.3133	12.6567	6.14333	20.6667	4.6	323.2	145.805	118.3	104.07	2.58
3	15-GU	47.6667	10.5	2.69	14.3333	8.5	15.4667	11.115	3.36833	14.4167	4.41667	66	25	84.31	46.08	1.63
3	16-GPD	102	15.6667	3.06	14.6667	12.6667	23.3033	13.28	6	17.95	4.95667	207.286	93.1621	80.75	80.69	4.22
3	17-MU	109	31	5.12	13	12	26.11	12.51	6.7	12.81	3.74	161.6	66.8154	83.98	90.25	3.42
3	18-BAL	114	12	4.65	14	8	24.97	12.7	4.96	22	5.42	392	162.545	77.62	86.06	3.36
3	19-BIL	47	28	2.4	6	10	27.79	12.24	4.15	14	4.8	31.6	10.6558	40.35	52.08	1.92
3	20-KUT	111	29	5.8	9	11	18.3	11.95	4.78	16	5.12	163.059	71.0355	62.06	74.36	3.36
3	21-TOPAZ	68.04	8	1.9	11.5463	10.1111	18.8	9.9	2.95	16.0724	4.39556	123.703	65.7848	77.5	68.9	3.05722

## Sheet: graphic
	Population Code	Plant height (cm)		Stem number (Adet)		Stem diameter (mm)		Leaf length (mm)		Leaf width (mm)
	Parameter
	year	2022	2023	2022	2023	2022	2023	2022	2023	2022	2023
	1-AL	103.33	110.83	15.33	22.78	4.94	5.58	16.04	22.3	4.41	5.2
	4-KC	57.67	63.17	10.5	32.83	3.59	3.82	12.65	20.31	3.55	5.21
	5-KGU	55.33	39.5	9.5	30.5	4.48	2.7	14.79	12.94	4.39	3.45
	6-EA	59.33	64,22e	17.5	25.89	3.89	3.19	12.5	15.11	4.09	4.58
	7-EC	66.67	64.34	19.5	28.56	3.36	3.74	12.53	12.88	3.48	4.66
	8-KK	71	58.33	16.17	9.83	4.08	2.9	14.53	14.26	5.03	4.36
	9-AY	50.5	38	19.9	20	4.09	2.63	11.83	12.99	4.17	3.28
	10-MB	75.67	66.89	17.5	27.83	3.8	4.42	18.8	17.9	4.52	3.62
	11-MC	61.83	63.22	16.33	41.67	3.31	3.65	14.39	14.37	3.83	4.2
	12-SH	99.18	110.06	18.67	31.11	4.06	6.64	15.42	20.24	4.8	5.54
	13-AMI	84.83	80	14.5	27.78	3.67	4.05	14.91	13.34	3.34	3.78
	14-GC	75.17	76.39	18.17	25.17	3.97	4.57	15.29	18.33	3.71	4.2
	15-GU	68.33	59.72	18.17	17	3.54	2.9	16.76	14.42	3.16	4.42
	16-GPD	96	95.17	18	13.33	5.34	3.73	16.3	17.37	4.3	5
	17-MU	105.67	99.33	12	27.67	5.11	5.08	16.07	13.6	5.03	3.43
	18-BAL	102.33	115	20.67	22.33	3.74	5.03	12.87	17.3	7.82	4.64
	19-BIL	61.33	49	21.67	21.67	3.35	2.27	12.52	12.54	3.38	3.97
	20-KUT	95.67	111	6.33	23.33	3.9	5.39	13.54	18.83	2.62	5.91
	21-TOPAZ	52.67	62.64	8	7.67	2.17	2.07	9.46	16.06	1.95	4.41

## Sheet: Tables
Table 1: Location information of seeds collected from nature												Table 4. Distance between the highest and lowest flowers, number of flowering shoots, flower diameter, petal length, petal width data for 2022-2023
Population Code	Population Name	Coordinate and Registration Information	Altitude (m)	Barcode No								Population/	Distance between the highest and lowest flowers (cm)		Number of flowering		Flower diameter (mm)		Petal length (mm)		Petal width (mm)
1-AL	Sapadere/Alanya	36º 29´ 14´´ N 32º 18´ 3´´ E	378	NGBB 018001								Parameter			Shoots (Shoots/Stem)
4-KC	Cesme/Kas	36º 22´ 28´´ N 29º 43´ 52´´ E	536	NGBB 018002								Year	2022	2023	2022	2023	2022	2023	2022	2023	2022	2023
5-KGU	Üçoluk/Gömbe/Kaş	36º 31´ 40´´ N 29º 39´ 34´´ E	1312	NGBB 018003								1-AL	21.33	14.33	1967-10-01	14.22	23.77	2024-09-24	13.14	13.37	2025-06-01	1983-05-01
6-EA	Between Gömbe-Akçay/Kaş	36º 34´ 35´´ N 29º 43´ 55´´ E	1124	NGBB 018004								4-KC	2017-11-01	2024-11-08	7.00	2024-11-08	23.78	24.79	13.85	13.42	1938-06-01	1985-05-01
7-EC	Cobanisa-Elmalı	36º 51´ 59´´ N 30º 1´ 43´´ E	1188	NGBB 018004								5-KGU	20.33	1950-07-01	12.00	1950-09-01	21.63	20.80	1959-12-01	1947-12-01	1946-05-01	1982-02-01
8-KK	Town/Kas	36º 18´ 35´´ N 29º 43' 46´´ E	250	NGBB 018005								6-EA	12.83d	1987-09-01	10.00	2024-11-10	23.28	22.14	13.23	1952-12-01	1954-05-01	1999-05-01
9-AY	Altinyaka/Kumluca	36º 33´ 42´´ N 30º 20´ 41´´ E	926	NGBB 018006								7-EC	13.00d	1933-08-01	2017-09-01	1978-09-01	24.72	22.48	1980-12-01	1973-12-01	1985-06-01	1988-05-01
10-MB	Beskonak/Manavgat	37º 10´ 11´´ N 31º 11´ 11´´ E	166	NGBB 018007								8-KK	1967-08-01	1978-09-01	1967-10-01	1983-08-01	22.97	18.23	1946-12-01	1970-11-01	1955-05-01	2024-01-04
11-MC	Caltepe/Manavgat	37º 18´ 44´´ N 31º 12´ 8´´ E	485	NGBB 018008								9-AY	2017-10-01	1933-06-01	1983-07-01	6.00	24.47	18.43	13.29	2024-05-11	1950-05-01	1997-02-01
12-SH	Haskiziloren/Serik	37º 29´ 14´´ N 30º 98´ 32´´ E	990	NGBB 018009								10-MB	1933-11-01	2024-11-12	2017-11-01	2028-12-01	26.67	23.31	13.71	13.22	2024-05-06	2013-05-01
13-AMI	Murtiçi/Akseki	36º 89´ 63´´ N 31º 76´ 45´´ E	537	NGBB 018010								11-MC	1933-11-01	1978-10-01	2017-11-01	2022-10-01	25.15	2024-01-20	13.85	2024-05-12	2017-06-01	1989-04-01
14-GC	Rotten/Gundoğmuş	36º 47´ 53´´ N 31º 50´ 49´´ E	719	NGBB 018011								12-SH	23.18	18.44	15.50	1983-12-01	23.91	22.20	1957-11-01	1983-11-01	1989-06-01	1933-05-01
15-GU	Umutlu/Gundoğmuş	36º 46´ 56´´ N 32º 0´ 30´´ E	886	NGBB 018012								13-AMI	14.83	1933-10-01	12.00	1967-08-01	25.93	21.18	13.93	1958-12-01	1969-05-01	1978-04-01
16-GPD	Doganca/Gazipasa	36º 15´ 81´´ N 32º 32´ 20´´ E	700	NGBB 018013								14-GC	15.17	2024-06-10	1933-10-01	2024-06-10	24.99	19.47	13.74	1979-10-01	1992-05-01	2024-01-05
17-MU	Mugla	36º 96´ 60´´ N 28º 68´ 86´´ E	704	NGBB 018014								15-GU	17.33	13.39	14.00	2024-11-10	24.45	15.46	13.17	2024-12-11	2021-06-01	1937-03-01
18-BAL	Balıkesir	39º 38´ 54´´ N 27º 52´ 57´´ E	470	TR 55375								16-GPD	18.00	1950-10-01	11.00	11.00	23.30	2024-12-21	1984-12-01	2024-06-12	1985-05-01	1939-05-01
19-BIL	Bilecik	40º 09´ 31´´ N 29º 58´ 33´´ E	1788	TR 82501								17-MU	22.33	14.67	13.00	11.00	22.83	23.55	1985-11-01	1979-12-01	2027-05-01	1981-05-01
20-KUT	Kutahya	39º 25´ 00´´ N 29º 58´ 60´´ E	1108	TR 71546								18-BAL	21.00	15.33	13.00	1967-10-01	23.21	2024-03-26	1939-11-01	13.35	2024-10-05	2022-05-01
												19-BIL	11.00	5.00	15.33	1933-11-01	26.77	24.36	14.87	13.17	1933-06-01	1934-04-01
												20-KUT	27.00	1933-12-01	1967-07-01	1967-11-01	23.80	21.72	2017-12-01	2024-05-13	1988-05-01	1984-04-01
												21-TOPAZ	13.00	2019-10-01	1933-11-01	1936-10-01	21.57	18.98	1965-11-01	2017-10-01	1987-04-01	2024-02-03
Table 2. Meteorological data of the experiment years
	Total Precipitation (mm)				Mean Temperature (ºC)
Months	LYA	2021	2022	2023	LYA	2021	2022	2023				Table 5. Data for 2022-2023 on fresh flower weight, dry flower weight, pseudohypericin, hypericin, and hyperforin
January	234.6	317.0	168.8	20.6	10.0	2024-02-11	10.62	10.04				Population/	Fresh flower weight (g plant-1)		Dry flower weight (g plant-1)		Pseudohypericin (mg/100g-1)		Hypericin		Hyperforin (%)
February	152.1	26.0	16.1	6.2	2024-07-10	2024-03-12	10.72	9.13				Parameter							(mg/100g-1)
March	94.0	35.0	125	215	2024-09-12	2024-06-12	13.22	13.83				Year	2022	2023	2022	2023	2022	2023	2022	2023	2022	2023
April	49.4	4.0	0	26	2024-04-16	2024-08-16	18.92	15.48				1-AL	80.08	211.11	31.90	91.19	58.86	80.60	66.39	144.23	1999-03-01	1957-03-01
May	32.1	5.0	7.6	173.2	2024-06-20	2024-03-22	20.96	19.43				4-KC	41.84	131.46	15.18	51.78	73.90	97.42	53.02	67.09	2015-03-01	1956-02-01
June	11.0	18.0	21.4	6.4	2024-03-25	25.0	25.28	23.91				5-KGU	1930-11-01	49.00	2021-04-01	22.83	72.42	82.33	49.03	55.96	1942-03-01	2023-03-01
July	2024-05-04	0.0	0	0.2	2024-05-28	2024-07-29	28.76	30.03				6-EA	52.10	101.35	19.81	40.14	82.19	97.05	55.89	71.35	1974-03-01	1989-03-01
August	2024-05-04	1.0	2.2	0	2024-04-28	2024-03-28	27.17	27.5				7-EC	42.59	88.96	15.28	33.52	104.25	124.10	68.02	66.90	1968-03-01	2020-04-01
September	2024-06-16	24.0	0	7.2	2024-02-25	2024-07-24	24.22	24.86				8-KK	50.10	184.11	20.94	88.48	60.46	76.83	46.72	55.92	1948-03-01	1978-03-01
October	67.9	14.0	25.6	4.4	2024-06-20	2024-06-20	20.31	20.94				9-AY	2024-01-15	40.97	1965-05-01	18.50	61.63	54.02	56.35	65.37	1957-02-01	2024-11-02
November	132.1	382.0	89.8	0.03	2024-05-15	2024-06-17	15.19	20.71				10-MB	60.77	208.70	23.36	86.00	58.70	69.74	66.12	68.23	1950-02-01	1984-02-01
December	261.2	236.0	8.2	123	2024-06-11	2024-03-13	12.48	12.89				11-MC	55.85	202.23	2024-09-21	88.37	67.29	64.05	50.92	56.63	1936-02-01	1939-02-01
Mean	-	-	-	-	2024-08-18	2024-05-19	18.99	19.06				12-SH	69.19	252.50	26.80	111.25	71.31	93.97	52.58	73.27	2019-03-01	1935-03-01
Total	1060.0	1062.0	464.7	582.23	-	-	-	-				13-AMI	72.66	199.21	27.97	98.22	44.40	75.72	46.98	59.24	2024-03-03	2024-03-01
*LYA: Long Year Average (1930-2022)												14-GC	88.05	236.07	34.43	108.30	72.94	107.30	70.74	95.51	1960-02-01	1990-02-01
												15-GU	42.19	82.73	16.56	36.20	57.45	89.10	61.14	65.38	2024-12-02	1952-02-01
												16-GPD	81.93	152.95	31.38	69.45	44.99	78.77	53.42	73.43	1989-03-01	1935-04-01
Table 3. Pseudohypericin, hypericin, and hyperforin analysis conditions												17-MU	91.00	160.90	35.81	66.53	54.75	83.99	81.90	90.45	1954-03-01	1960-03-01
Duration (minutes)	A (%)	B (%)										18-BAL	128.89	351.67	48.26	157.70	52.44	82.41	73.45	85.70	1937-03-01	1950-03-01
0.00	95	5										19-BIL	41.84	31.47	1965-05-01	1961-10-01	35.42	48.98	54.35	56.68	2018-02-01	1931-02-01
0.50	95	5										20-KUT	130.00	161.59	47.53	70.40	24.18	69.43	62.73	73.43	1933-03-01	2026-03-01
2.00	20	80										21-TOPAZ	49.33	131.64	21.48	63.12	46.09	76.60	52.04	67.87	2017-03-01	1990-02-01
5.00	10	90
11.00	5	95
12.00	5	95										Table 6. Analysis of variance table for characteristics
2024-10-12	95	5										Parameters	Source of variation	Degrees of freedom		Mean squares		F value		P value
13.00	95	5										Years		2022	2023	2022	2023	2022	2023	2022	2023
												Plant height (cm)	Block	2	2	297.41	297.41	1960-05-01	1960-05-01	0.0076	0.0076
													Population	18	18	1088.15	1088.15	20.49	20.49	<.0001	<.0001
													Error	36	36	53.11	53.11
												Number of stems (number of plants )-1	Block	2	2	2019-07-01	283.70	0.23	1943-02-01	0.79	0.1028
													Population	18	18	58.91	201.23	1992-01-01	1972-01-01	0.046	0.0816
													Error	36	36	30.64	116.97
												Stem Diameter (mm)	Block	2	2	1950-02-01	0.23	2025-05-01	2024-02-01	0.0100	0.3701
													Population	18	18	1958-01-01	1942-03-01	1932-03-01	15.21	0.0011	<.0001
													Error	36	36	0.48	0.22
												Leaf Length (mm)	Block	2	2	1950-09-01	0.86	1986-01-01	0.13	0.1700	0.8808
													Population	18	18	13.98	26.49	1974-02-01	1995-03-01	0.0049	0.0002
													Error	36	36	2024-10-05	1971-06-01
												Leaf Width (mm)	Block	2	2	2020-01-01	0.60	0.32	1966-01-01	0.7253	0.2040
													Population	18	18	1936-04-01	1963-01-01	2017-01-01	1951-04-01	0.3302	<.0001
													Error	36	36	1971-03-01	0.36
												Distance between the highest and lowest flowers (cm)	Block	2	2	14.78	2024-08-09	0.92	1986-01-01	0.4079	0.1699
													Population	18	18	83.37	33.01	2019-05-01	1977-06-01	<.00001	<.0001
													Error	36	36	2024-07-16	1988-04-01
												Number of flowering shoots (Number)	Block	2	2	1935-04-01	1967-01-01	0.61	0.55	0.55	0.5844
													Population	18	18	16.60	1981-09-01	1935-02-01	2020-03-01	0.01	0.0015
													Error	36	36	2024-07-07	2024-07-03
												Flower diameter (mm)	Block	2	2	1997-02-01	1934-11-01	0.94	1984-02-01	0.4001	0.0713
													Population	18	18	1995-05-01	20.90	1988-01-01	2024-05-01	0.0522	<.0001
													Error	36	36	2016-03-01	1999-03-01
												Petal length (mm)	Block	2	2	0.91	0.85	2024-07-01	0.84	0.3544	0.4404
													Population	18	18	1964-02-01	1979-02-01	2024-11-03	1976-02-01	0.0019	0.0046
													Error	36	36	0.85	2024-01-01
												Petal width (mm)	Block	2	2	0.65	0.31	1967-01-01	0.47	0.2033	0.6300
													Population	18	18	0.89	1933-03-01	2029-02-01	1998-04-01	0.0169	<.0001
													Error	36	36	0.39	0.67
												Fresh flower weight g/plant	Block	2	2	748.78	918.37	2024-02-08	0.56	0.0013	0.5740
													Population	18	18	3045.30	19817.48	32.63	2017-12-01	<.00001	<.0001
													Error	36	36	93.33	1628.79
												Dry flower weight g/plant	Block	2	2	65.55	152.71	1949-04-01	0.48	0.0181	0.6255
													Population	18	18	437.59	4123.05	29.99	1984-12-01	<.00001	<.0001
													Error	36	36	14.59	321.22
												Pseudohypericin (mg/100 g)	Block	2	2	300.23	143.09	1962-06-01	0.72	0.0036	0.4937
													Population	18	18	965.34	947.55	21.27	1977-04-01	<.00001	<.0001
													Error	36	36	45.38	198.72
												Hypericin(mg/100 g)	Block	2	2	862.60	215.92	1950-06-01	1963-01-01	0.0039	0.2092
													Population	18	18	288.53	1265.20	2017-02-01	1958-09-01	0.0233	<.0001
													Error	36	36	132.70	132.09
												Hyperforin (%)	Block	2	2	0.04	0.26	0.20	2024-02-01	0.8221	0.3715
													Population	18	18	1.00	2022-01-01	1967-04-01	1975-04-01	<.00001	<.0001
													Error	36	36	0.21	0.26
